# Supplementary material
Source: HighWire-hosted journal article supplement (https://erj.ersjournals.com/highwire/filestream/113913/field_highwire_adjunct_files/0/online_supplement_01353-2012.pdf)
Supplement: online_supplement_01353-2012.pdf [file online_supplement_01353-2012.pdf]

Online Supplement: Plasma AGEs and skin autofluorescence are increased in COPD

P.Gopal<sup>1</sup>, N.L. Reynaert<sup>1</sup>, J.L.J.M.Scheijen<sup>3</sup>, L. Engelen<sup>3</sup>,  
C.G.Schalkwijk<sup>3</sup>, F.M.E.Franssen<sup>2</sup>, E.F.M. Wouters<sup>1,2</sup>, E.P.A.  
Rutten<sup>2\*</sup>.

**Supplementary table 1: Association of plasma AGEs and AFR with FEV1 %predicted in the patients (n=88)**

|                | model | $\beta^a$ | 95 %CI           | <i>p</i> |
|----------------|-------|-----------|------------------|----------|
| CML            | 1     | -0.098    | -0.345 to 0.149  | 0.432    |
|                | 2     | -0.097    | -0.345 to 0.151  | 0.437    |
|                | 3     | 0.025     | -0.248 to 0.299  | 0.854    |
|                | 4     | 0.033     | -0.247 to 0.314  | 0.815    |
| CEL            | 1     | -0.276    | -0.590 to 0.037  | 0.084    |
|                | 2     | -0.277    | -0.592 to 0.039  | 0.085    |
|                | 3     | -0.140    | -0.529 to 0.248  | 0.474    |
|                | 4     | -0.153    | -0.552 to -0.246 | 0.447    |
| Ln-Pentosidine | 1     | 0.160     | -0.184 to 0.504  | 0.357    |
|                | 2     | 0.162     | -0.182 to 0.506  | 0.352    |
|                | 3     | 0.336     | -0.040 to 0.713  | 0.079    |
|                | 4     | 0.370     | -0.014 to 0.755  | 0.059    |
| AFR            | 1     | 0.084     | -0.183 to 0.351  | 0.534    |
|                | 2     | 0.088     | -0.173 to 0.348  | 0.504    |
|                | 3     | 0.180     | -0.143 to 0.503  | 0.271    |
|                | 4     | 0.141     | -0.188 to 0.470  | 0.397    |

<sup>a</sup>  $\beta$ , standardized regression coefficient: indicates increase (in SD) in FEV<sub>1</sub>% per SD increase in plasma AGEs or AFR.

Model 1, adjusted for age, sex

Model 2, model 1+ pack year

Model 3, model 2 + GFR, BMI, HDL cholesterol, LnTriglycerides

Model 4, model 3 + LnCRP

**Online supplement table 2: Correlation of plasma AGEs and AFR with other disease parameters (n=88)**

|             | DLCO               | BODE               | Charlson comorbidity score |
|-------------|--------------------|--------------------|----------------------------|
| CML         | r=0.023<br>p=0.85  | r=0.002<br>p=0.98  | r=0.189<br>p=0.104         |
| CEL         | r=0.082<br>p=0.502 | r=0.037<br>p=0.75  | r=-0.075<br>p=0.52         |
| Pentosidine | r=0.091<br>p=0.45  | r=-0.43<br>p=0.715 | r=0.061<br>p=0.603         |
| AFR         | r=0.113<br>p=0.33  | r=0.027<br>p=0.80  | r=0.029<br>p=0.79          |
